# Supplementary material for: Enabling stable and high-rate cycling of a Ni-rich layered oxide cathode for lithium-ion batteries by modification with an artificial Li+-conducting cathode-electrolyte interphase
Source: Royal Society of Chemistry journal article supplement (doi:10.1039/d1ta02563e), 2021-01-01
Supplement: d1ta02563e2.pdf [file d1ta02563e2.pdf]

## Supporting Information

### **Enabling Stable and High-Rate Cycling of Ni-Rich Layered Oxide Cathode for Lithium-Ion Batteries by Modification with an Artificial Li<sup>+</sup>-Conducting Cathode-Electrolyte Interphase**

*Shixuan Wang*<sup>a</sup>, *Alvin Dai*<sup>b</sup>, *Yuliang Cao*<sup>a</sup>, *Hanxi Yang*<sup>a</sup>, *Amine Khalil*<sup>b</sup>, *Jun Lu*<sup>b\*</sup>, *Hui Li*<sup>a\*</sup>,  
*Xinping Ai*<sup>a\*</sup>

<sup>a</sup> Hubei Key Laboratory of Electrochemical Power Sources, Wuhan University, Wuhan  
430072, China

<sup>b</sup> Chemical Sciences and Engineering Division, Argonne National Laboratory, Lemont, IL  
60439, USA

\* Corresponding author E-mail address: xpai@whu.edu.cn (X. P. Ai); lih@whu.edu.cn (H. Li);  
junlu@anl.gov (J. Lu).

**Table S1.** The vibration modes and assignment of the FT-IR absorption bands.

| Wave number (cm <sup>-1</sup> ) | Mode of vibration | Assignment                           |
|---------------------------------|-------------------|--------------------------------------|
| 1805                            | $\nu_{C=O}$       | polycarbonate                        |
| 1605                            | $\nu_{C=O}$       | ROCOOLi                              |
| 1431                            | $\nu_{C-O}$       | ROCOOLi                              |
| 1384                            | $\beta_{C-H}$     | -CH <sub>3</sub>                     |
| 1261                            | $\nu_{C-O}$       | polycarbonate                        |
| 1169                            | $\nu_{s. C-O-C}$  | polycarbonate                        |
| 1135                            | $\nu_{C-C}$       | C-C                                  |
| 1075                            | $\nu_{as. C-O-C}$ | polycarbonate                        |
| 986                             | $\beta_{C-H}$     | C-H                                  |
| 866                             | $\delta_{Li-O}$   | ROLi/Li <sub>2</sub> CO <sub>3</sub> |
| 767                             | $\gamma_{C-H}$    | {CH <sub>2</sub> } <sub>n</sub>      |
| 724                             | $\gamma_{C-H}$    | {CH <sub>2</sub> } <sub>n</sub>      |

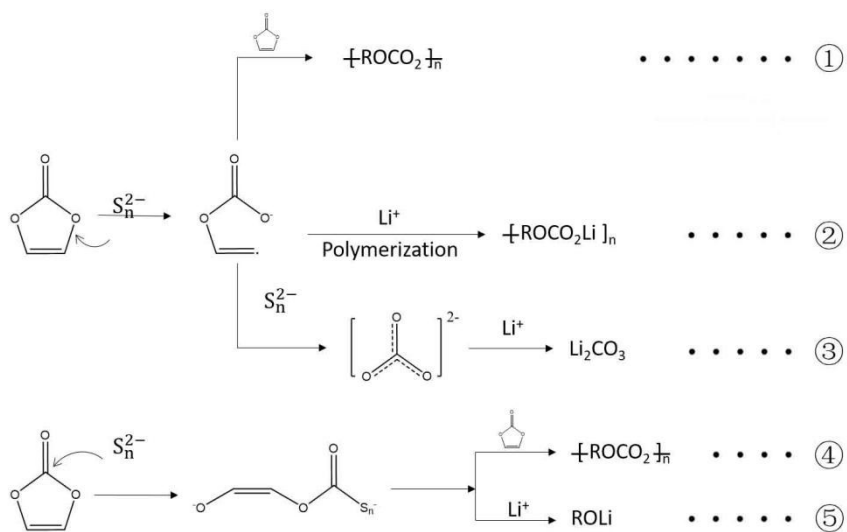

**Fig. S1.** Possible reaction routes of polysulfides with VC molecules.

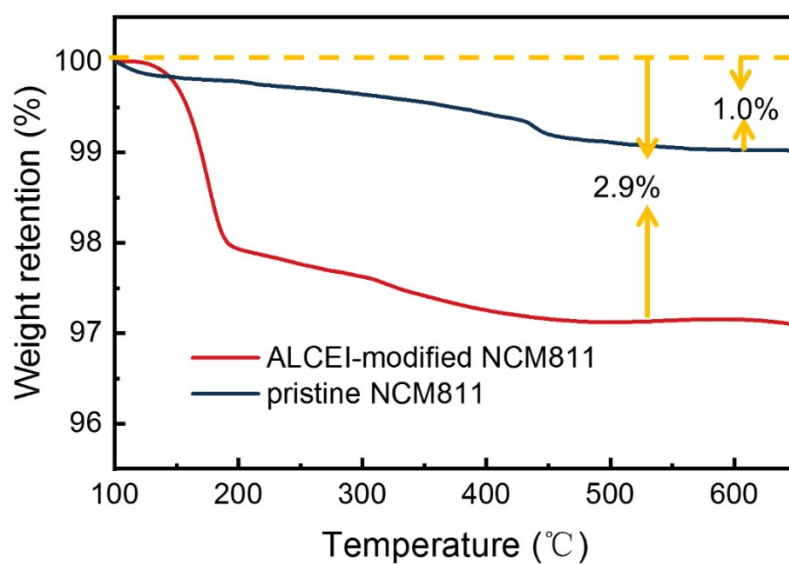

**Fig. S2.** TG curves of pristine and ALCEI-modified NCM811 in air.

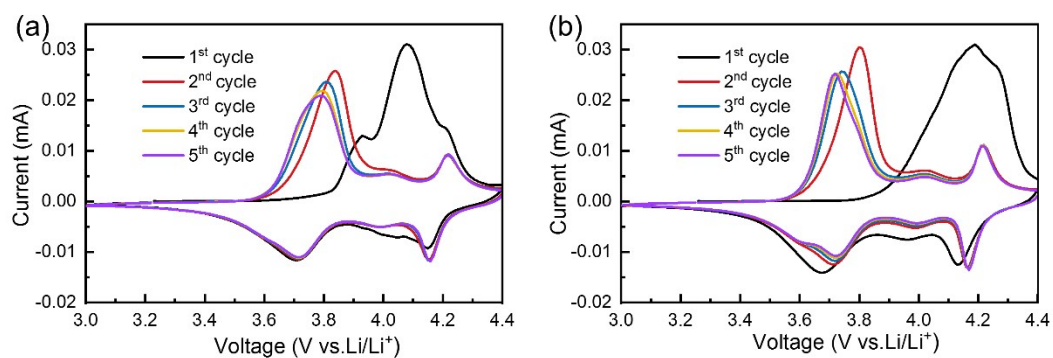

**Fig. S3.** CV curves of (a) pristine and (b) ALCEI-modified NCM811 cathodes with a scan rate of  $0.2 \text{ mV s}^{-1}$  in a potential interval of 3.0-4.4 V (vs  $\text{Li/Li}^+$ ).

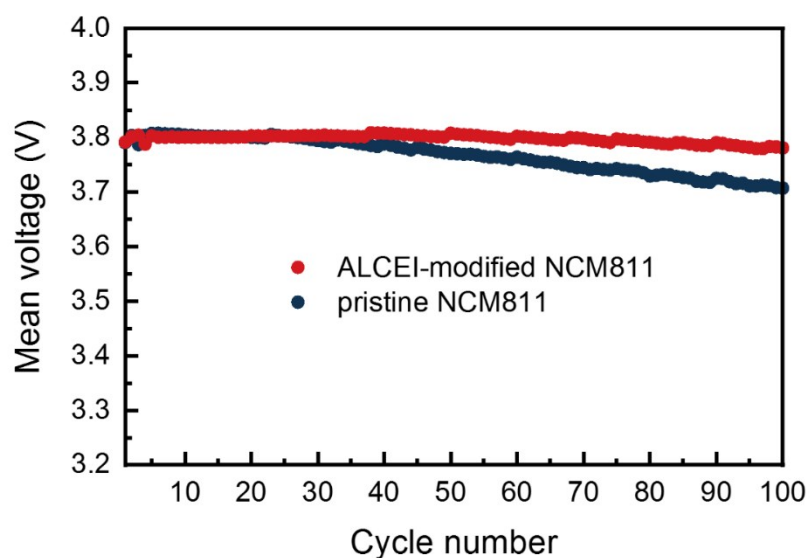

**Fig. S4.** Variations of mean discharge voltage for both the pristine and ALCEI-modified NCM811 cathodes with cycling numbers.

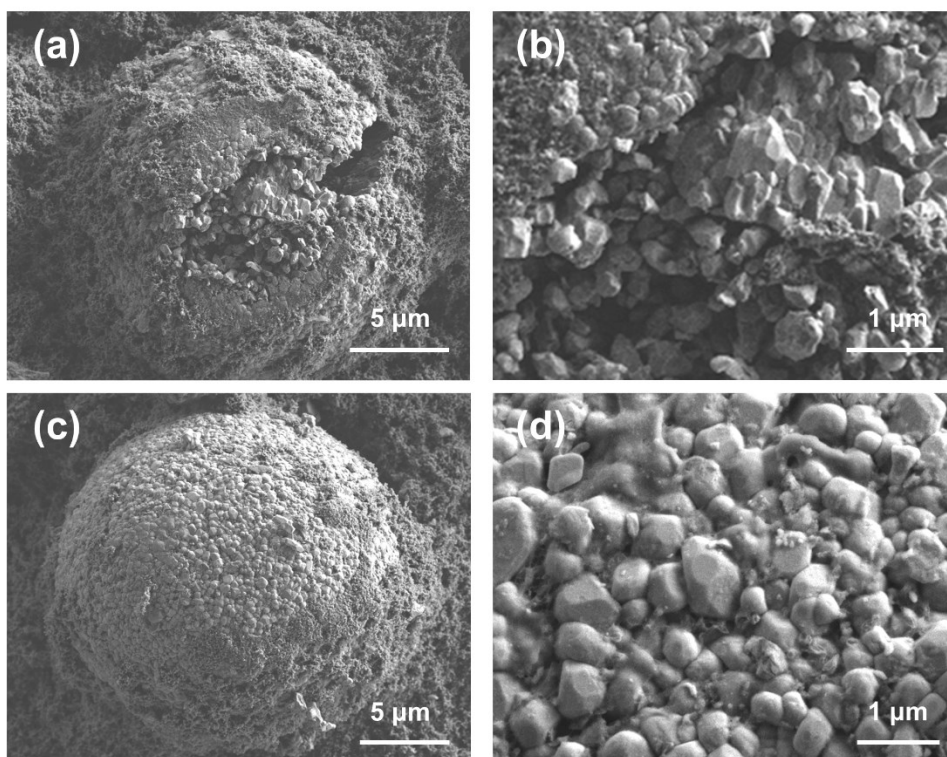

**Fig. S5.** SEM images of the cathodes after 40 cycles: (a, b) pristine and (c, d) ALCEI-modified NCM811.

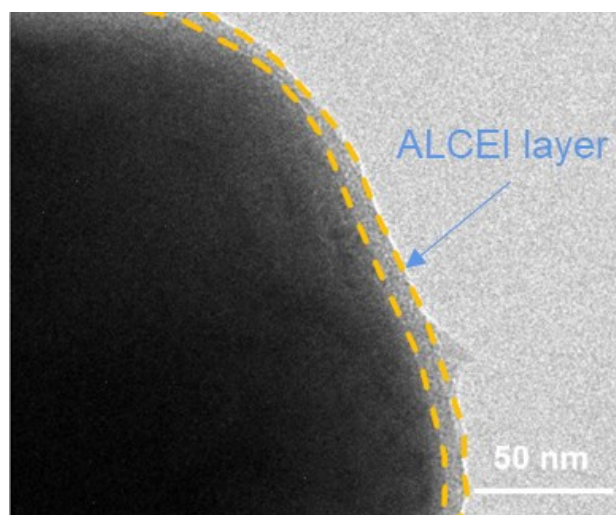

**Fig. S6.** TEM image of the ALCEI-modified cathode after 40 cycles
